# Supplementary material for: A series of heterospin complexes based on lanthanides and pyridine biradicals: synthesis, structure and magnetic properties
Source: Royal Society of Chemistry journal article supplement (doi:10.1039/c4ra15074k), 2015-01-01
Supplement: c4ra15074k1.pdf [file c4ra15074k1.pdf]

## Supporting Information

### **A series of heterospin complexes based on lanthanides and pyridine biradicals: synthesis, structure and magnetic properties**

Shang Yong Zhou, Xin Li, Ting Li, Li Tian,\* Zhong Yi Liu and Xiu Guang Wang

*Tianjin Key Laboratory of Structure and Performance for Functional Molecule, Key Laboratory of Inorganic-Organic Hybrid Functional Material Chemistry, Ministry of Education, College of Chemistry, Tianjin Normal University, Tianjin 300387, P. R. China.*

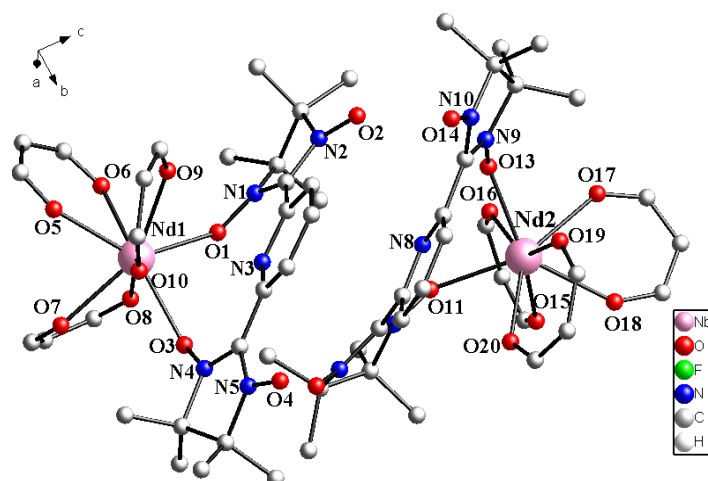

**Fig. S1** Simplified view of the crystal structure of **2**. Fluorine, hydrogen, and some carbon atoms are omitted for clarity.

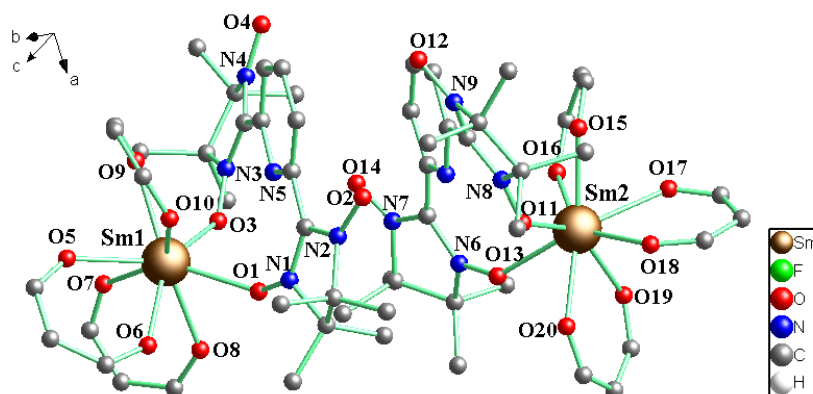

**Fig. S2** Simplified view of the crystal structure of **3**. Fluorine, hydrogen, and some carbon atoms are omitted for clarity.

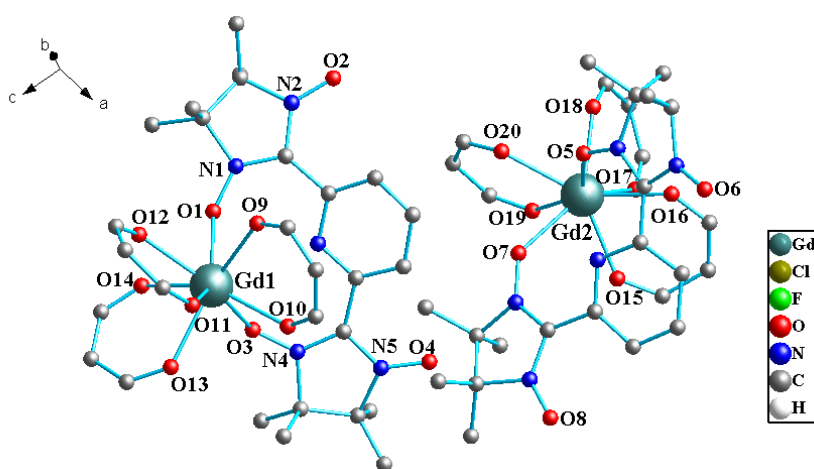

**Fig. S3** Simplified view of the crystal structure of **4**. Fluorine, hydrogen, and some carbon atoms are omitted for clarity.

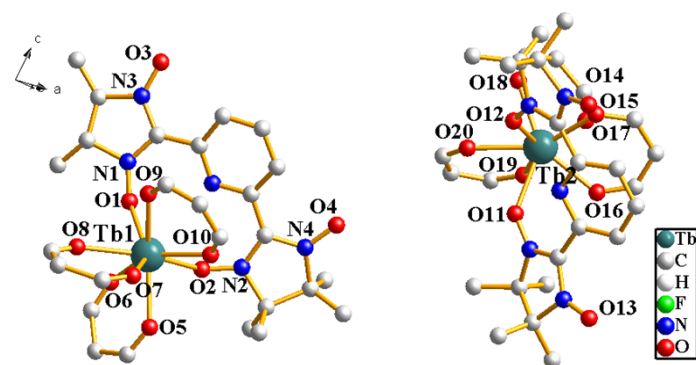

**Fig. S4** Simplified view of the crystal structure of **5**. Fluorine, hydrogen, and some carbon atoms are omitted for clarity.

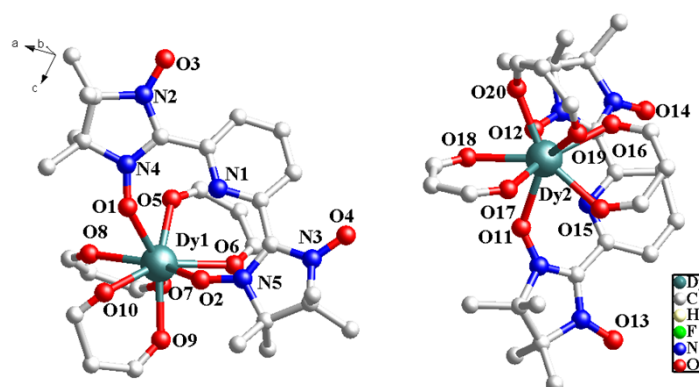

**Fig. S5** Simplified view of the crystal structure of **6**. Fluorine, hydrogen, and some carbon atoms are omitted for clarity.

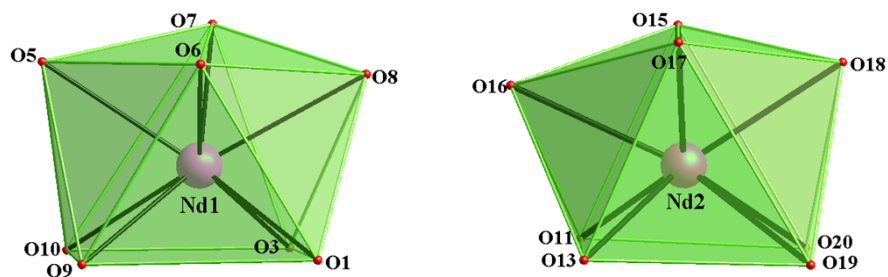

**Fig. S6** The coordination polyhedral of Nd(III) in complex **2**.

**Table S1.**  $\delta$  ( $^\circ$ ) and  $\varphi$  ( $^\circ$ ) values for complex **2**.

|             | Nd1                         |      | Nd2                            |      | DD   | TP   | SAP  |
|-------------|-----------------------------|------|--------------------------------|------|------|------|------|
| $\delta_1$  | O10 [O9 O3] O1 <sup>a</sup> | 1.3  | O11 [O13 O20] O19 <sup>a</sup> | 0.5  | 29.5 | 0.0  | 0.0  |
| $\delta_2$  | O5 [O7 O6] O8 <sup>a</sup>  | 16.6 | O16 [O15 O17] O18 <sup>a</sup> | 27.1 | 29.5 | 21.8 | 0.0  |
| $\delta_3$  | O5 [O9 O6] O1 <sup>a</sup>  | 47.6 | O16 [O13 O17] O19 <sup>a</sup> | 53.3 | 29.5 | 48.2 | 52.4 |
| $\delta_4$  | O10 [O7O3] O8 <sup>a</sup>  | 55.6 | O11 [O15 O20] O18 <sup>a</sup> | 41.8 | 29.5 | 48.2 | 52.4 |
| $\varphi_1$ | O6–O3–O5–O10 <sup>b</sup>   | 24.3 | O17–O20–O16–O11 <sup>b</sup>   | 9.1  | 0.0  | 14.1 | 24.5 |
| $\varphi_2$ | O7–O9–O8–O1 <sup>b</sup>    | 17.1 | O15–O13–O18–O19 <sup>b</sup>   | 22.9 | 0.0  | 14.1 | 24.5 |

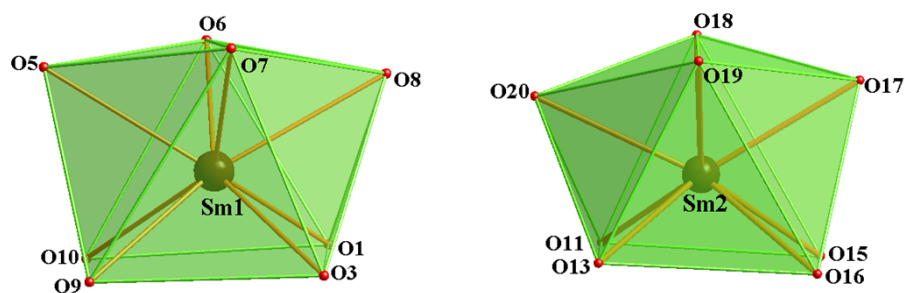

**Fig. S7** The coordination polyhedral of Sm(III) in complex **3**.

**Table S2.**  $\delta$  ( $^\circ$ ) and  $\varphi$  ( $^\circ$ ) values for complex **3**.

|             | Sm1                         |      | Sm2                            |      | DD   | TP   | SAP  |
|-------------|-----------------------------|------|--------------------------------|------|------|------|------|
| $\delta_1$  | O10 [O9 O1] O3 <sup>a</sup> | 1.2  | O11 [O13 O15] O16 <sup>a</sup> | 0.2  | 29.5 | 0.0  | 0.0  |
| $\delta_2$  | O5 [O6 O7] O8 <sup>a</sup>  | 17.3 | O20 [O18 O19] O17 <sup>a</sup> | 27.9 | 29.5 | 21.8 | 0.0  |
| $\delta_3$  | O5 [O9 O7] O3 <sup>a</sup>  | 41.1 | O20 [O13 O19] O16 <sup>a</sup> | 51.8 | 29.5 | 48.2 | 52.4 |
| $\delta_4$  | O10 [O6 O1] O8 <sup>a</sup> | 50.2 | O11 [O18 O15] O17 <sup>a</sup> | 40.3 | 29.5 | 48.2 | 52.4 |
| $\varphi_1$ | O7–O1–O5–O10 <sup>b</sup>   | 22.0 | O19–O15–O20–O11 <sup>b</sup>   | 8.2  | 0.0  | 14.1 | 24.5 |
| $\varphi_2$ | O6–O9–O8–O3 <sup>b</sup>    | 12.5 | O18–O13–O17–O16 <sup>b</sup>   | 20.9 | 0.0  | 14.1 | 24.5 |

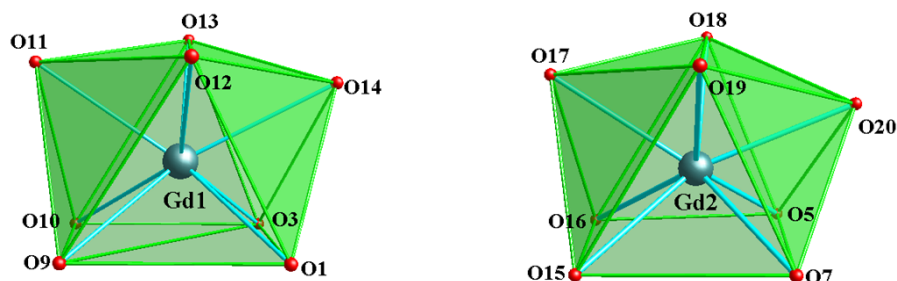

**Fig. S8** The coordination polyhedral of Gd(III) in complex **4**.

**Table S3.**  $\delta$  ( $^\circ$ ) and  $\varphi$  ( $^\circ$ ) values for complex **4**.

|             |  | Gd2           |  | SAP  |
|-------------|--|---------------|--|------|
| $\delta_1$  |  | O16 [O15 O5]  |  | 0.0  |
| $\delta_2$  |  | O17 [O18 O19] |  | 0.0  |
| $\delta_3$  |  | O17 [O15O19]  |  | 52.4 |
| $\delta_4$  |  | O16[O18 O5]   |  | 52.4 |
| $\varphi_1$ |  | O19–O5–O17-   |  | 24.5 |
| $\varphi_2$ |  | O18–O15–O20   |  | 24.5 |

**Fig. S9** The coordination polyhedral of Tb(III) in complex **5**.

**Table S4.**  $\delta$  ( $^\circ$ ) and  $\varphi$  ( $^\circ$ ) values for complex **5**.

|             | Tb1                         |      | Tb2                            |      | DD   | TP   | SAP  |
|-------------|-----------------------------|------|--------------------------------|------|------|------|------|
| $\delta_1$  | O10 [O9 O2] O1 <sup>a</sup> | 1.3  | O15 [O16 O12] O11 <sup>a</sup> | 0.5  | 29.5 | 0.0  | 0.0  |
| $\delta_2$  | O7 [O5 O8] O6 <sup>a</sup>  | 21.1 | O17 [O18 O19] O20 <sup>a</sup> | 29.2 | 29.5 | 21.8 | 0.0  |
| $\delta_3$  | O7 [O9 O8] O1 <sup>a</sup>  | 47.3 | O17 [O16 O19] O11 <sup>a</sup> | 41.4 | 29.5 | 48.2 | 52.4 |
| $\delta_4$  | O10 [O5 O2] O6 <sup>a</sup> | 53.4 | O15[O18 O12] O20 <sup>a</sup>  | 51.7 | 29.5 | 48.2 | 52.4 |
| $\varphi_1$ | O8–O2–O7–O10 <sup>b</sup>   | 23.6 | O19–O12–O17–O15 <sup>b</sup>   | 21.5 | 0.0  | 14.1 | 24.5 |
| $\varphi_2$ | O5–O9–O6–O1 <sup>b</sup>    | 15.4 | O18–O16–O20–O11 <sup>b</sup>   | 7.9  | 0.0  | 14.1 | 24.5 |

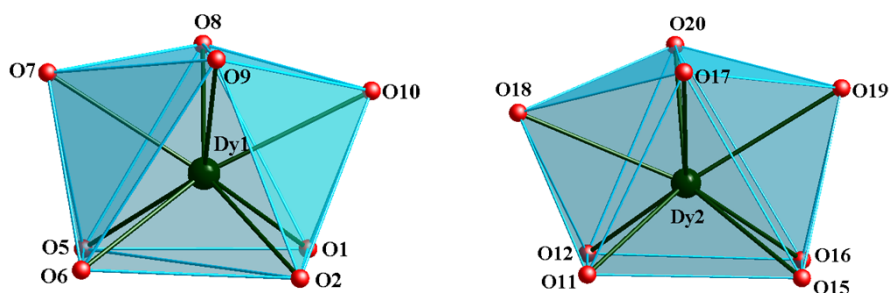

**Fig. S10** The coordination polyhedral of Dy(III) in complex **6**.

**Table S5.**  $\delta$  ( $^\circ$ ) and  $\varphi$  ( $^\circ$ ) values for complex **6**

|             | Dy1                         |        | Dy2                            |        | DD   | TP   | SAP  |
|-------------|-----------------------------|--------|--------------------------------|--------|------|------|------|
| $\delta_1$  | O5 [O6 O1] O2 <sup>a</sup>  | 1.886  | O12 [O11 O16] O15 <sup>a</sup> | 0.0793 | 29.5 | 0.0  | 0.0  |
| $\delta_2$  | O7 [O8 O9] O10 <sup>a</sup> | 20.848 | O18 [O20 O17] O19 <sup>a</sup> | 29.244 | 29.5 | 21.8 | 0.0  |
| $\delta_3$  | O7 [O6 O9] O2 <sup>a</sup>  | 40.649 | O18 [O11 O17] O15 <sup>a</sup> | 50.778 | 29.5 | 48.2 | 52.4 |
| $\delta_4$  | O5 [O8 O1] O10 <sup>a</sup> | 48.670 | O12 [O20 O16] O19 <sup>a</sup> | 40.056 | 29.5 | 48.2 | 52.4 |
| $\varphi_1$ | O9–O1–O7–O5 <sup>b</sup>    | 19.350 | O17–O16–O18–O12 <sup>b</sup>   | 8.453  | 0.0  | 14.1 | 24.5 |
| $\varphi_2$ | O8–O6–O10–O2 <sup>b</sup>   | 12.465 | O20–O11–O19–O15 <sup>b</sup>   | 19.46  | 0.0  | 14.1 | 24.5 |

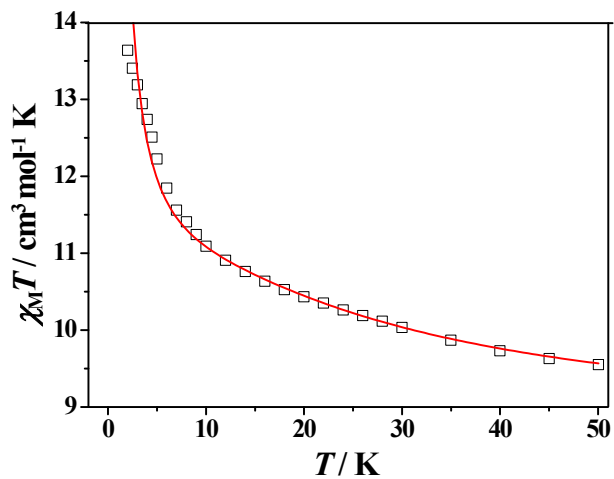

Fig. S11  $\chi_M T$  vs.  $T$  ( $\square$ ) plots for complex 4 at the temperature of 0-50 K.

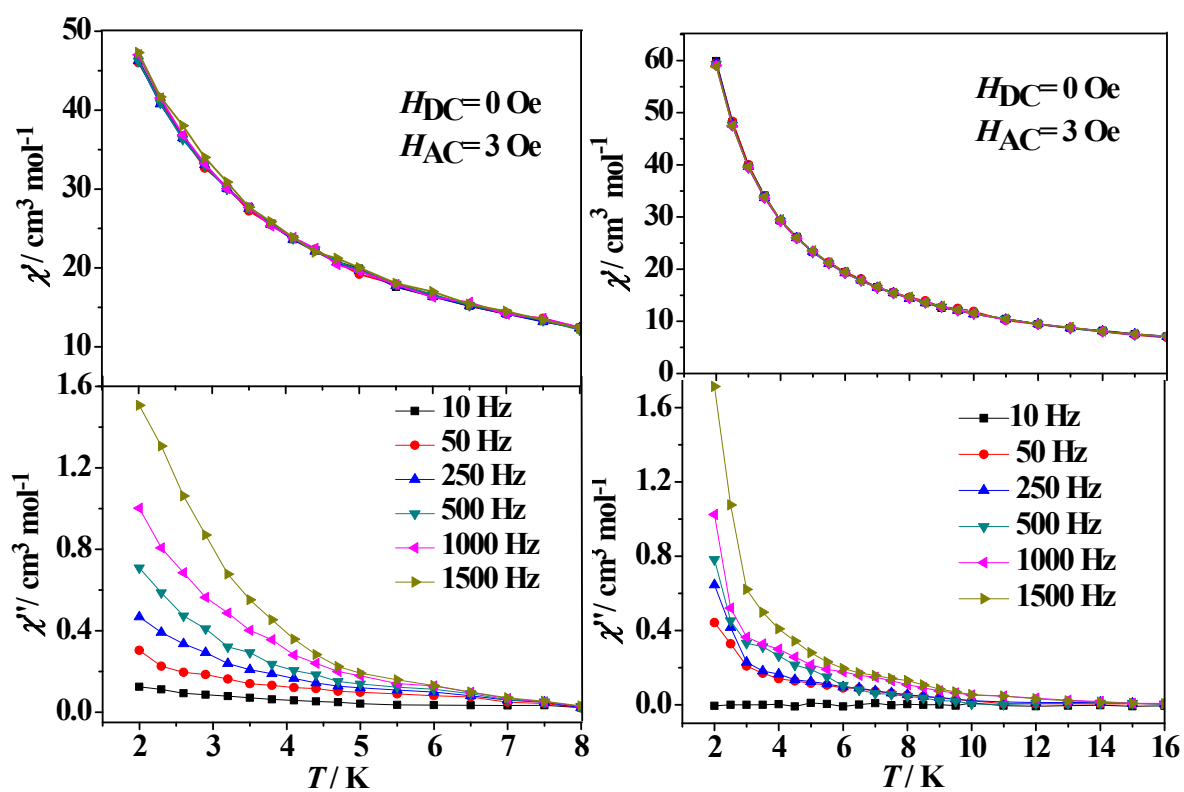

Fig. S12 Temperature dependence of the in-phase(top) and out-of-phase(bottom) components of the AC magnetic susceptibility for complex 5(left) and 6(right) in a 0 Oe DC field with an oscillation of 3 Oe.

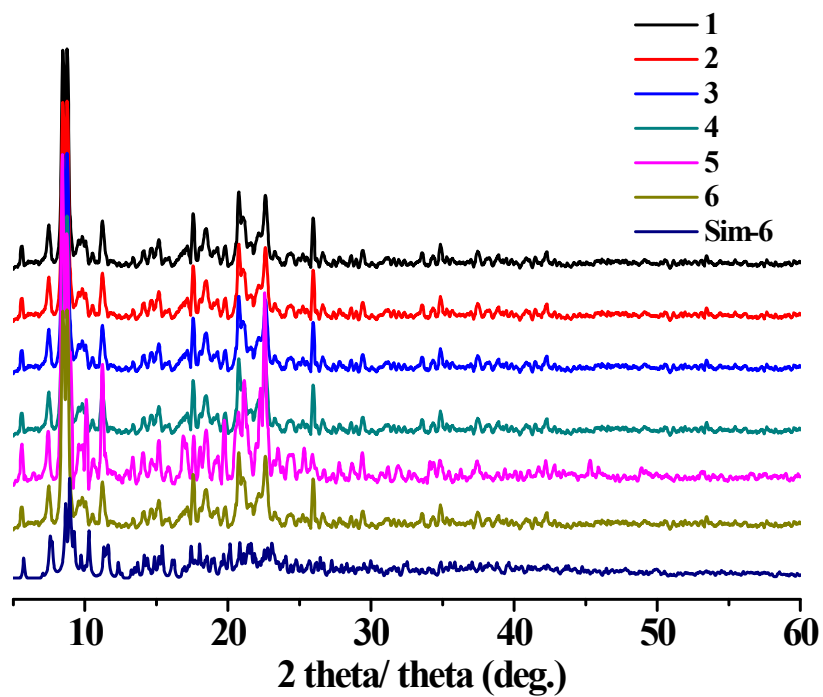

**Fig. S13** Powder X-ray diffractions of 1-6.
